# Supplementary material for: Stripe Patterns in Wind Forecasts Induced by Physics-Dynamics Coupling on a Staggered Grid in CMA-GFS 3.0
Source: Copernicus journal article supplement (doi:10.5194/egusphere-2025-2704), 2025-07-03
Supplement: Supplementary file [file egusphere-2025-2704-AC6-supplement.pdf]

## Von Neumann Analysis for Pure Damping Equation

For the pure damping equation neglecting advection term:

$$\frac{\partial u}{\partial t} = -\alpha u, \quad \alpha > 0 \quad (1)$$

where  $-\alpha u$  the damping term and  $\alpha$  the damping coefficient. Using forward Euler in time, the discretization equation takes the form:

$$\frac{u_j^{n+1} - u_j^n}{\Delta t} = -\alpha_j u_j^n \quad (2)$$

Assume that the numerical solution at  $j^{\text{th}}$  point at  $n^{\text{th}}$  time step is a single Fourier component of the form:

$$u_j^n = V^n e^{ikj\Delta x} \quad (3)$$

where  $k$  is the wavenumber, and  $V^n$  the time-dependent complex amplitude at time step  $n$ .

Substituting the Fourier mode from Eq. (3) into Eq. (2), the amplification factor is obtained:

$$G = \frac{V^{n+1}}{V^n} = 1 - \Delta t \alpha_j \quad (4)$$

Equation (4) shows that  $G$  is purely real so that the discretization scheme (2) is non-dispersive.

If the damping term is discretized in a staggered manner, similar to the Eq. (1) and (2) in our manuscript, Eq. (2) becomes:

$$\frac{u_j^{n+1} - u_j^n}{\Delta t} = -\frac{1}{2} \left( \alpha_{j-\frac{1}{2}} \frac{u_{j-1}^n + u_j^n}{2} + \alpha_{j+\frac{1}{2}} \frac{u_j^n + u_{j+1}^n}{2} \right) \quad (5)$$

Substituting Eq. (3) into Eq. (5) yields the amplification factor:

$$G = 1 - \frac{\Delta t \bar{\alpha}}{2} (1 + \cos(k\Delta x)) - i \frac{\Delta t \Delta \alpha}{4} \sin(k\Delta x) \quad (6)$$

where  $\bar{\alpha} = \frac{\alpha_{j-\frac{1}{2}} + \alpha_{j+\frac{1}{2}}}{2}$ ,  $\Delta \alpha = \alpha_{j+\frac{1}{2}} - \alpha_{j-\frac{1}{2}}$ .

For waves with wavelengths greater than  $2\Delta x$ , we have  $0 < k\Delta x < \pi$  and therefore  $\sin(k\Delta x) \neq 0$ . If  $\Delta \alpha \neq 0$ , the imaginary part of Eq. (6) becomes non-zero. This indicates that the discrete scheme represented by Eq. (5) exhibits dispersive behavior, since the amplification factor now possesses an imaginary component, which introduces a phase shift between wave components. Variations in amplitude are therefore accompanied by changes in phase, leading to frequency-dependent wave propagation speeds.

This analysis leads to the same conclusion as presented in our manuscript.
